# Supplementary material for: Is CAR T a drug or a therapeutic pathway? Intention to treat versus per protocol analysis of real world studies of CAR-T cell therapy in relapsed refractory diffuse large B cell lymphoma
Source: Springer Nature journal article supplement (doi:10.1038/s41408-024-01183-8), 2024-11-07

## Supplementary table

**Table S1.** Meta-analyses and subgroup meta-analyses.

|                                                           | ITT CRR    | PP CRR     | ITT ORR    | PP ORR     |
|-----------------------------------------------------------|------------|------------|------------|------------|
| Overall                                                   |            |            |            |            |
| Studies, <i>N</i>                                         | 10         | 10         | 10         | 10         |
| Patients, <i>N</i>                                        | 2246       | 1988       | 2246       | 1988       |
| Events, <i>N</i>                                          | 945        | 945        | 1360       | 1360       |
| Estimated proportion from random effect model, % (95% CI) | 38 (31-46) | 45 (37-53) | 57 (48-66) | 67 (57-77) |
| <i>I</i> <sup>2</sup> , %                                 | 91.2       | 90.5       | 94.0       | 94.6       |
| Location                                                  |            |            |            |            |

|                                                           |              |              |              |                  |
|-----------------------------------------------------------|--------------|--------------|--------------|------------------|
| Estimated proportion from random effect model, % (95% CI) |              |              |              |                  |
| EU                                                        | 31 (23-40)   | 37 (28-46)   | 48 (36-59)   | 56 (42-69)       |
| USA                                                       | 46 (37-56)   | 54 (45-63)   | 68 (63-74)   | 79 (75-82)       |
| I <sup>2</sup> , %                                        |              |              |              |                  |
| EU                                                        | 92.0         | 92.0         | 96.0         | 96.0             |
| USA                                                       | 85.0         | 80.0         | 60.0         | 0.0              |
| <i>p</i> <sup>a</sup>                                     | <b>0.024</b> | <b>0.006</b> | <b>0.002</b> | <b>&lt;0.001</b> |
| Presence of PMBCL                                         |              |              |              |                  |
| Estimated proportion from random effect model, % (95% CI) |              |              |              |                  |
| Presence                                                  | 40 (28-53)   | 48 (37-60)   | 61 (48-73)   | 74 (63-83)       |
| Absence                                                   | 36 (27-46)   | 41 (30-53)   | 53 (40-66)   | 61 (45-76)       |

|           |       |       |       |       |
|-----------|-------|-------|-------|-------|
| $I^2$ , % |       |       |       |       |
| Presence  | 91.6  | 86.9  | 90.2  | 83.0  |
| Absence   | 82.6  | 86.0  | 93.1  | 95.0  |
| $p^a$     | 0.612 | 0.402 | 0.382 | 0.194 |

Bold values: statistically significant  $p$  value.

CRR, complete response rate; ITT, intention-to-treat; ORR, overall response rate; PMBCL, primary mediastinal large B-cell lymphoma; PP, per protocol.

<sup>a</sup>Cochran's Q test.

**Table S2.** Results of meta-regression.

|              |                                             | Complete response rate, intention to treat |                    |                             |        |       |             | Complete response rate, per protocol |                    |                             |        |       |             |
|--------------|---------------------------------------------|--------------------------------------------|--------------------|-----------------------------|--------|-------|-------------|--------------------------------------|--------------------|-----------------------------|--------|-------|-------------|
| Model number | Variables included                          | Studies, <i>N</i>                          | R <sup>2</sup> , % | residual I <sup>2</sup> , % | b      | SE(b) | <i>p</i>    | Studies, <i>N</i>                    | R <sup>2</sup> , % | residual I <sup>2</sup> , % | b      | SE(b) | <i>p</i>    |
| 1            | Median follow-up                            | 10                                         | 7.83               | 91.54                       | 0.005  | 0.004 | .168        | 10                                   | 7.86               | 90.71                       | 0.005  | 0.004 | .172        |
| 2            | Percentage of infused patients              | 10                                         | 11.67              | 91.36                       | 0.752  | 0.526 | .153        | 10                                   | 0.00               | 92.06                       | 0.393  | 0.591 | .506        |
| 3            | Percentage of bridging therapy <sup>a</sup> | 8                                          | 24.27              | 90.52                       | -0.463 | 0.279 | .097        | 8                                    | 41.71              | 86.23                       | -0.575 | 0.255 | <b>.024</b> |
|              |                                             | Overall response rate, intention to treat  |                    |                             |        |       |             | Overall response rate, per protocol  |                    |                             |        |       |             |
| Model number | Variables included                          | Studies, <i>N</i>                          | R <sup>2</sup> , % | residual I <sup>2</sup> , % | b      | SE(b) | <i>p</i>    | Studies, <i>N</i>                    | R <sup>2</sup> , % | residual I <sup>2</sup> , % | b      | SE(b) | <i>p</i>    |
| 1            | Median follow-up                            | 10                                         | 4.84               | 93.75                       | 0.005  | 0.004 | .237        | 10                                   | 0.00               | 94.77                       | 0.005  | 0.005 | .357        |
| 2            | Percentage of infused patients              | 10                                         | 0.00               | 94.58                       | 0.346  | 0.650 | .594        | 10                                   | 0.00               | 95.34                       | -0.322 | 0.750 | .675        |
| 3            | Percentage of bridging therapy <sup>a</sup> | 8                                          | 36.08              | 91.86                       | -0.635 | 0.299 | <b>.034</b> | 8                                    | 50.07              | 91.19                       | -0.850 | 0.312 | <b>.006</b> |

Bold values: statistically significant *p* value.

<sup>a</sup>Ghafouri et al. (2021) and Kittai et al. (2021) were excluded from the meta-regression of the proportion of patients receiving bridging therapy (BT) before infusion, since the proportion of BT in the updated databases was not available.

**Fig. S1 Flow chart.**

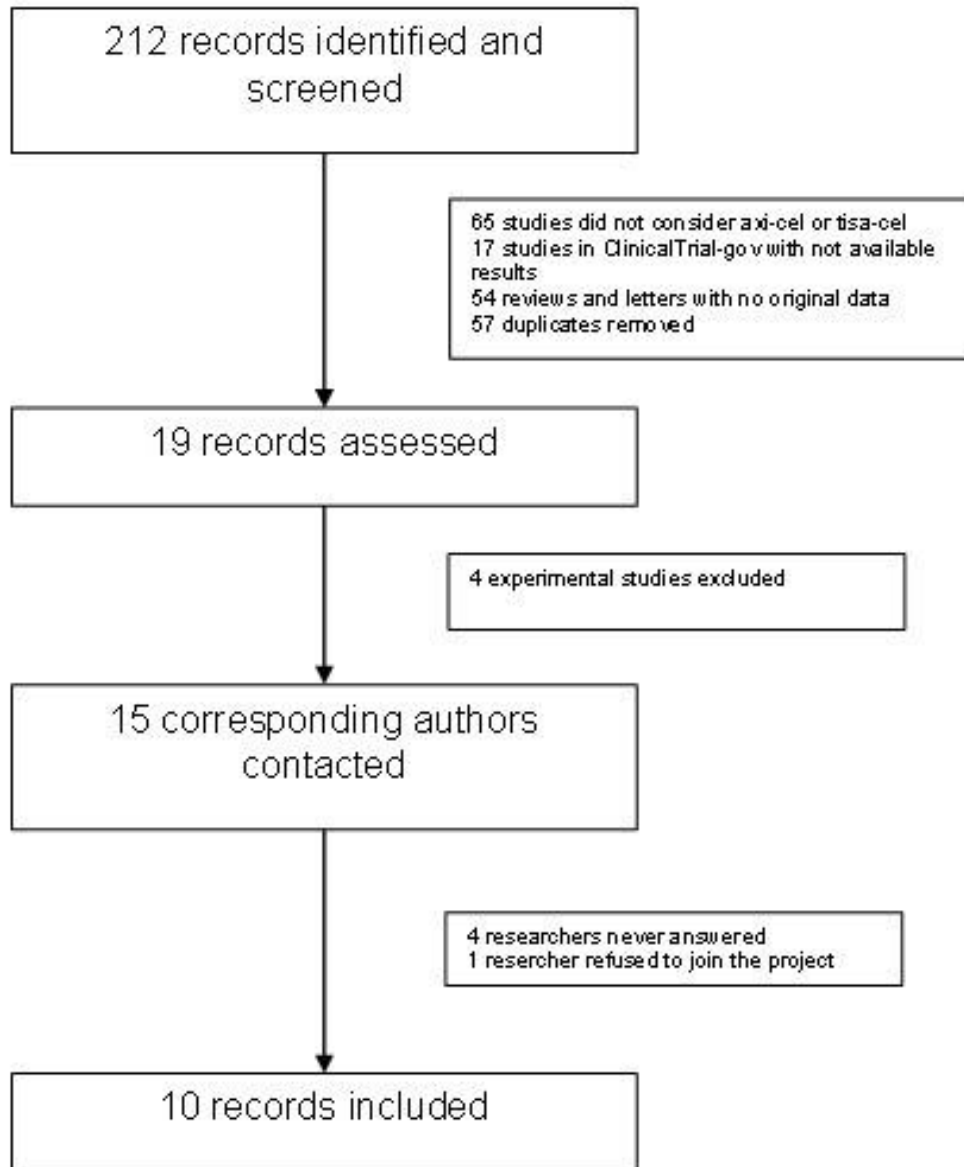

**Fig. S2 Forest plot of the subgroup analysis according to type of product.** A: CRR ITT; B: CRR PP; C: ORR ITT; D: ORR PP. CRR, complete response rate; ITT, intention-to-treat; ORR, overall response rate; PP, per protocol.

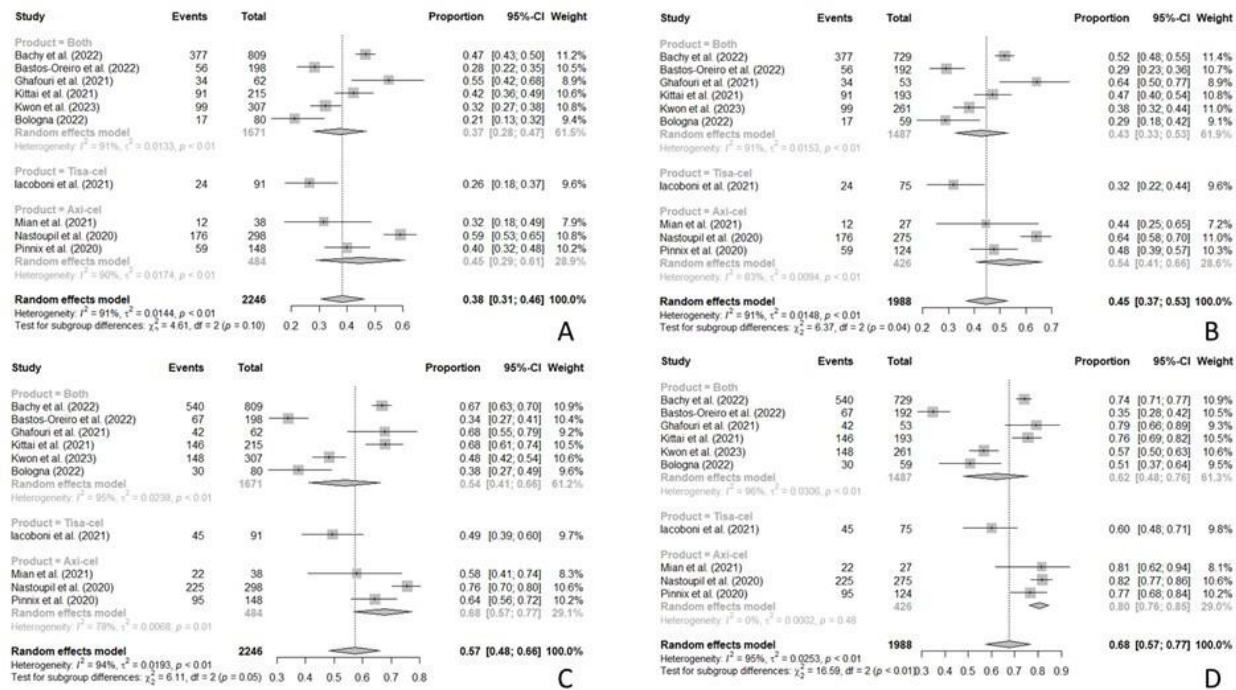

**Fig. S3 Bubble plot of the meta-regression of the percentage of bridging therapy.** A: CRR ITT; B: CRR PP; C: ORR ITT; D: ORR PP.

CRR, complete response rate; ITT, intention-to-treat; ORR, overall response rate; PP, per protocol.

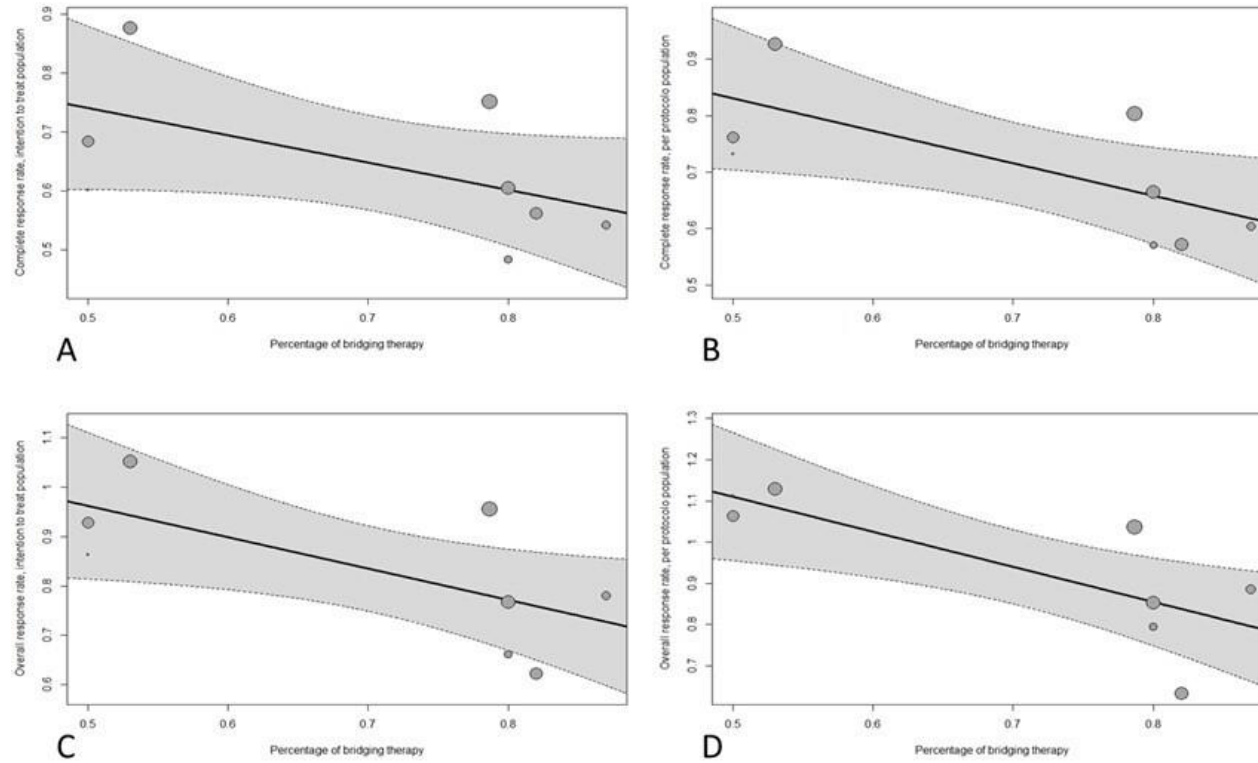

Supplement: MOESM1 [file 41408_2024_1183_MOESM1_ESM.pdf]
